# Supplementary material
Source: publisher site journal article supplement (https://www.dovepress.com/article/395064)
Supplement: Supplementary file 1 [file get_supplementary_file.php]

**S1 Table. In depth interview guide for women with obstetric fistula and supplementary informants**

| <b>PART I:-Background information</b> |                   |
|---------------------------------------|-------------------|
| ✎                                     | Transcript code:  |
| ✎                                     | District:         |
| ✎                                     | Kebele/residence: |
| ✎                                     | Date :            |
| ✎                                     | Start time        |
| ✎                                     | Finish time:      |
| ✎                                     | Interviewer:      |
|                                       | :                 |

| No | Questions                       | Response options                                                                                                                         | Skip |
|----|---------------------------------|------------------------------------------------------------------------------------------------------------------------------------------|------|
| 1. | What is your present age?       | 1. Year_____                                                                                                                             |      |
| 2. | What is your residence?         | 1. Urban<br>2. Rural                                                                                                                     |      |
| 3. | What is your marital status?    | 1. Never married<br>2. Married<br>3. Cohabiting/living together<br>4. Divorced/Separated<br>5. Widowed                                   |      |
| 4. | What is your Occupation         | 1. Non-Government employee<br>2. Government employee<br>3. Farmer<br>4. Merchant<br>5. Student<br>6. Housewife<br>7. Others specify----- |      |
| 5. | What is your educational level? | 1. Can't read and write<br>2. Read and write<br>3. Primary schools<br>4. Secondary and preparatory schools<br>5. College/university      |      |

|  |  |  |  |
|--|--|--|--|
|  |  |  |  |
|--|--|--|--|

## PART II

### Care seeking path checklist

#### For women with fistula

1. Where women with obstetric fistula go for treatment after they developed the problem?  
...**Probe**, do you know the place they go? (Holy water), spiritual sites etc.), Why they go there?
2. Where you go for treatment and solution just after you developed obstetric fistula?  
...**Probe**, can you tell me in order? Why you go there? What motivates you to go there?  
Why you choose it?  
....**Probe**, what supports/care you get from those places?  
....**Probe**, how do you see the care you received?  
.....**Probe**, what was wrong with that cares, why you choose/go for other cares?(if more than one care sought by her), **Probe**, type of care ,and how do they see those cares.  
**Probe**,
3. What recommendations you have for those places? ...**Probe**, regarding to the service you get?
4. What messages you have for mothers with obstetric fistula related to their care seeking?  
....**Probe**, also for those women with obstetric fistulas' families?

#### For Health care provider/health extension worker/ traditional birth attendant/traditional healer/religious leaders/community or kebele leader/program managers/health bureau

1. Where women with obstetric fistula go for treatment after they developed the problem?  
...**Probe**, do you know the place they go? (Hint :- ( holy water), spiritual sites etc.), Why they go there?  
...**Probe**, how they get your center of treatment?
2. What types of supports you gave them? ... **Probe**, can you explain those supports?

3. What messages you have for mothers with obstetric fistula related to their care seeking?  
...**Probe**, messages also for their family related to women with obstetric fistulas' care seeking.

**For Clients' family member**

1. Where women with obstetric fistula go for treatment after they developed the problem?  
...**Probe**, do you know the place they go in your area? (Hint :-( holy water), spiritual sites etc.), Why they go there? Why they go there? What motivates them to go there? Why they choose it?
2. What types of supports you gave them? ... **Probe**, can you explain those supports?
3. What messages you have for mothers with obstetric fistula related to their care seeking?  
...**Probe**, messages also for their family related to women with obstetric fistulas' care seeking.

***Thank you!***

Data collector

Name \_\_\_\_\_ Signature \_\_\_\_\_

Supervisor

Name \_\_\_\_\_ Signature \_\_\_\_\_
